# Supplementary material for: The structure of Erb1-Ytm1 complex reveals the functional importance of a high-affinity binding between two β-propellers during the assembly of large ribosomal subunits in eukaryotes
Source: PubMed Central journal article supplement — Nucleic Acids Res. 2015 Oct 17;43(22):11017–30. doi: 10.1093/nar/gkv1043 (PMC4678814; doi:10.1093/nar/gkv1043), 2015-10-17
Supplement: supp_gkv1043_nar-02491-r-2015-File008.pdf [file supp_gkv1043_nar-02491-r-2015-File008.pdf]

| <b>Probe name</b> | <b>5'-3' sequence</b>   |
|-------------------|-------------------------|
| Probe b           | CATGGCTTAATCTTTGAGAC    |
| Probe c           | GACTCTCCATCTCTTGCTTCTTG |
| Probe d           | TGTTACCTCTGGGCC         |
| Probe e           | TTTCGCTGCGTTCTTCATC     |
| Probe f           | GGCCAGCAATTTCAAGTTA     |
| Probe g           | GAACATTGTTGCCTAGA       |
| Probe h           | CTCCGCTTATTGATATGC      |
| Probe 5S          | GGTCACCCACTACACTACTCGG  |

**Supplementary Table S1.** Oligonucleotides used as probes for RNA analysis.

|                                                     | ChErb1 <sub>435-801</sub> /ChYtm1 | ChErb1 <sub>432-801</sub> /ChYtm1 | ChErb1[R486E] <sub>435-801</sub> /ChYtm1 |
|-----------------------------------------------------|-----------------------------------|-----------------------------------|------------------------------------------|
| <b>Data collection</b>                              |                                   |                                   |                                          |
| Space group                                         | P 6 <sub>5</sub> 2 2              | P 2 <sub>1</sub> 2 <sub>1</sub> 2 | P 6 <sub>5</sub> 2 2                     |
| Cell dimensions                                     |                                   |                                   |                                          |
| <i>a</i> , <i>b</i> , <i>c</i> (Å)                  | 169.11, 169.11, 154.04            | 86.443, 108.149, 108.618          | 170.75, 170.75, 155.66                   |
| $\alpha$ , $\beta$ , $\gamma$ (°)                   | 90, 90, 120                       | 90, 90, 90                        | 90, 90, 120                              |
| Resolution (Å)                                      | 48.82 - 3.1 (3.31 - 3.1)*         | 48.53 - 2.1 (2.175 - 2.1)*        | 85.38-3.0 (3.18-3.0)*                    |
| <i>R</i> <sub>merge</sub>                           | 0.282 (2.838)                     | 0.05838 (0.924)                   | 0.176 (1.862)                            |
| <i>I</i> / $\sigma$ <i>I</i>                        | 17 (2.5)                          | 18.69 (2.18)                      | 13.5 (1.6)                               |
| Completeness (%)                                    | 100.00 (100.00)                   | 99.90 (99.97)                     | 100.00 (100.00)                          |
| Redundancy                                          | 39.1 (40.2)                       | 6.5 (6.5)                         | 12.2 (12.7)                              |
| <b>Refinement</b>                                   |                                   |                                   |                                          |
| Resolution (Å)                                      | 48.82 - 3.1 (3.31 - 3.1)          | 48.53 - 2.1 (2.175 - 2.1)         | 85.38-3.0 (3.18-3.0)                     |
| No. reflections                                     | 24180 (4313)                      | 60041 (5923)                      | 27367 (4333)                             |
| <i>R</i> <sub>work</sub> / <i>R</i> <sub>free</sub> | 0.1936 (0.2940)/ 0.2390 (0.3557)  | 0.1639 (0.2386)/ 0.2132 (0.2703)  | 0.2016 (0.3153)/ 0.2621 (0.3914)         |
| No. atoms                                           | 6170                              | 6631                              | 6182                                     |
| Protein                                             | 6168                              | 6279                              | 6177                                     |
| Ligand/ion                                          | 2 <sup>a</sup>                    | 26 <sup>b</sup>                   | 5 <sup>c</sup>                           |
| Water                                               | 0                                 | 326                               | 0                                        |
| <i>B</i> -factors                                   | 102.40                            | 63.20                             | 89.70                                    |
| Protein                                             | 102.40                            | 63.40                             | 89.70                                    |
| Ligand/ion                                          | 96.10                             | 76.70                             | 84.70                                    |
| Water                                               |                                   | 57.80                             |                                          |
| R.m.s. deviations                                   |                                   |                                   |                                          |
| Bond lengths (Å)                                    | 0.006                             | 0.008                             | 0.006                                    |
| Bond angles (°)                                     | 1.26                              | 1.18                              | 1.35                                     |

**Supplementary table S2.** Data collection and refinement statistics

\*Values in parentheses are for highest-resolution shell.

<sup>a</sup>) Ligands: chloride ion

<sup>b</sup>) Ligands: chloride ion, sodium ion, glycerol, ethylene glycol

<sup>c</sup>) Ligands: chloride ion. Data were collected from one crystal for each dataset.

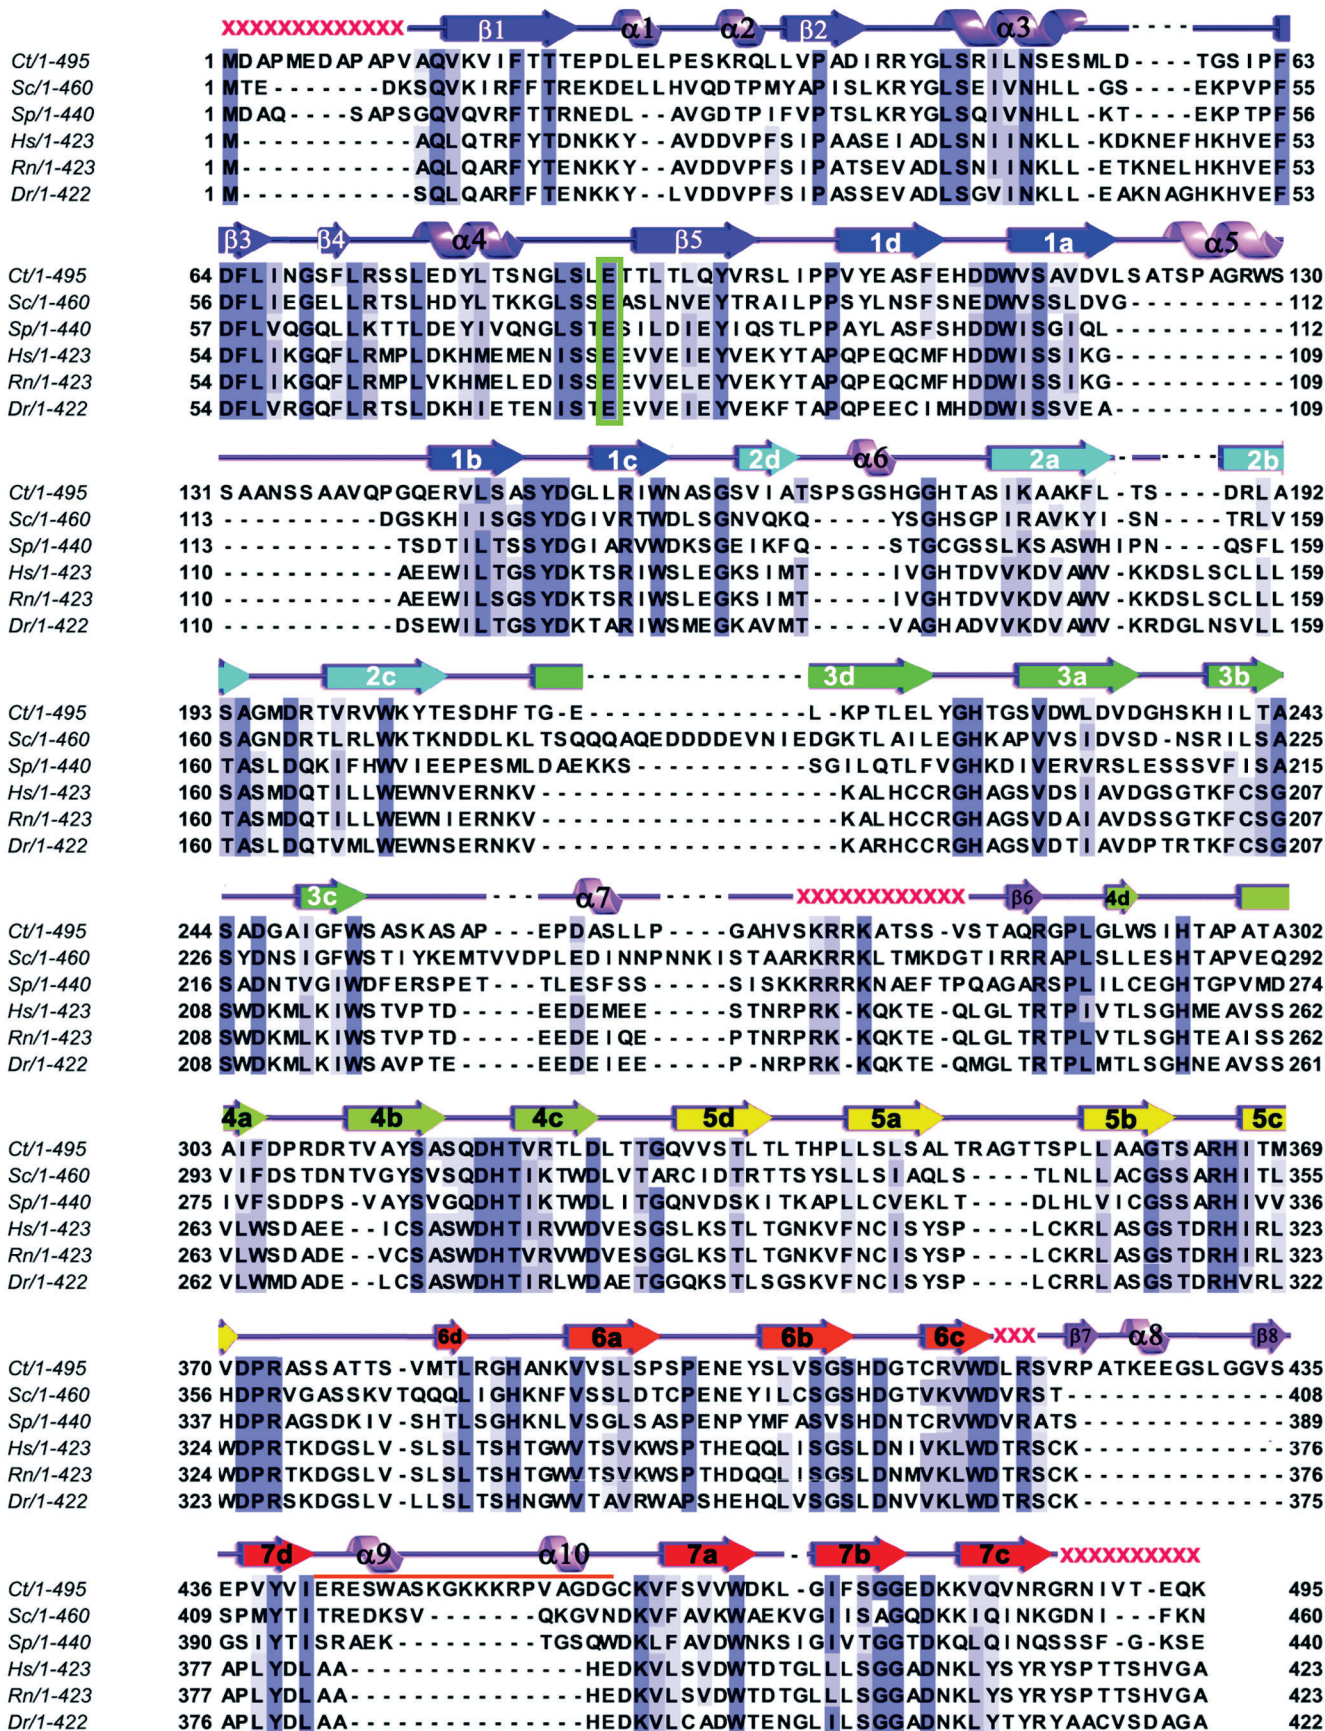

**Supplementary Figure S1.** Multiple sequence alignment of Ytm1 orthologues. Sequences corresponding to Ytm1 (or WDR12) proteins from *Chaetomium thermophilum* (Ct), *Saccharomyces cerevisiae* (Sc), *Schizosaccharomyces pombe* (Sp), *Homo sapiens* (Hs), *Rattus norvegicus* (Rn) and *Danio rerio* (Dr) were aligned using JalView. Secondary structure elements as seen in the final model of ChYtm1 are represented above the alignment.  $\beta$ -strands are marked with arrows,  $\alpha$ -helices are depicted with coils. Secondary structure elements corresponding to UBL are shown in purple. Coloring and numbering of the following  $\beta$ -strands correspond to the WD repeats. Conserved residues are marked with shadows. The conserved glutamic acid proposed to bind the MIDAS domain of Rea1 is marked with a green box. The sequence corresponding to the knob-like structure is shown with orange line

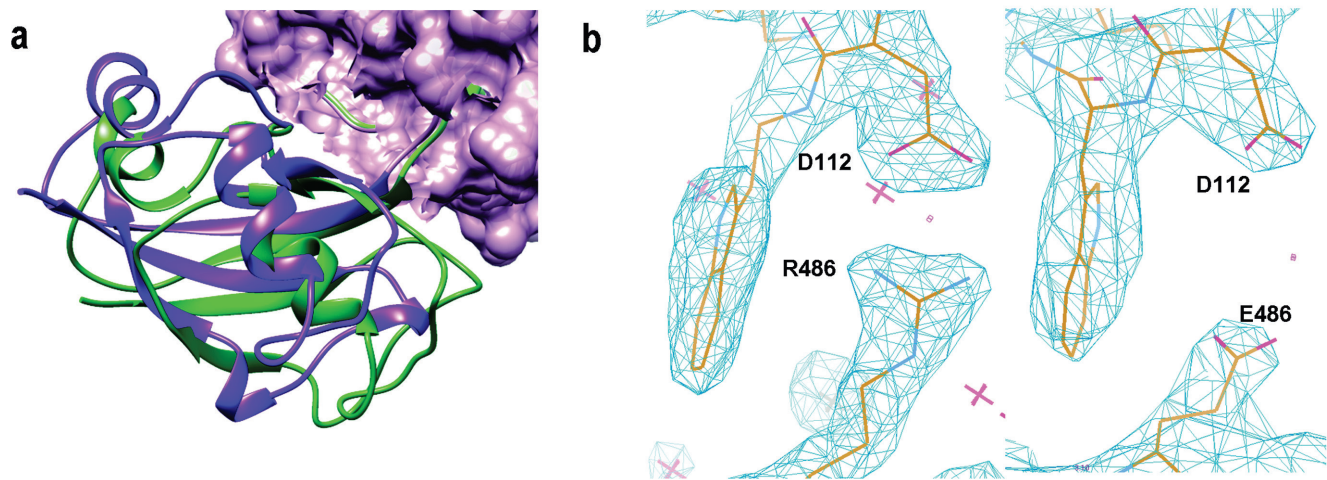

**Supplementary Figure S2.** (a) UBL of ChYtm1 presents certain degree of flexibility because it appears in two different orientations depending on the symmetry of the crystals. UBL in purple: P 21 21 2 and in green: P 65 2 2 space groups. (b) Upon successful crystallization of ChYtm1/ChErb1[R486E]<sub>432-801</sub> we proved that the  $\beta$ -propeller structure was intact and the only difference between both dimers was the lack of D112-R486 salt bridge (left) that is not formed in the mutant (right).

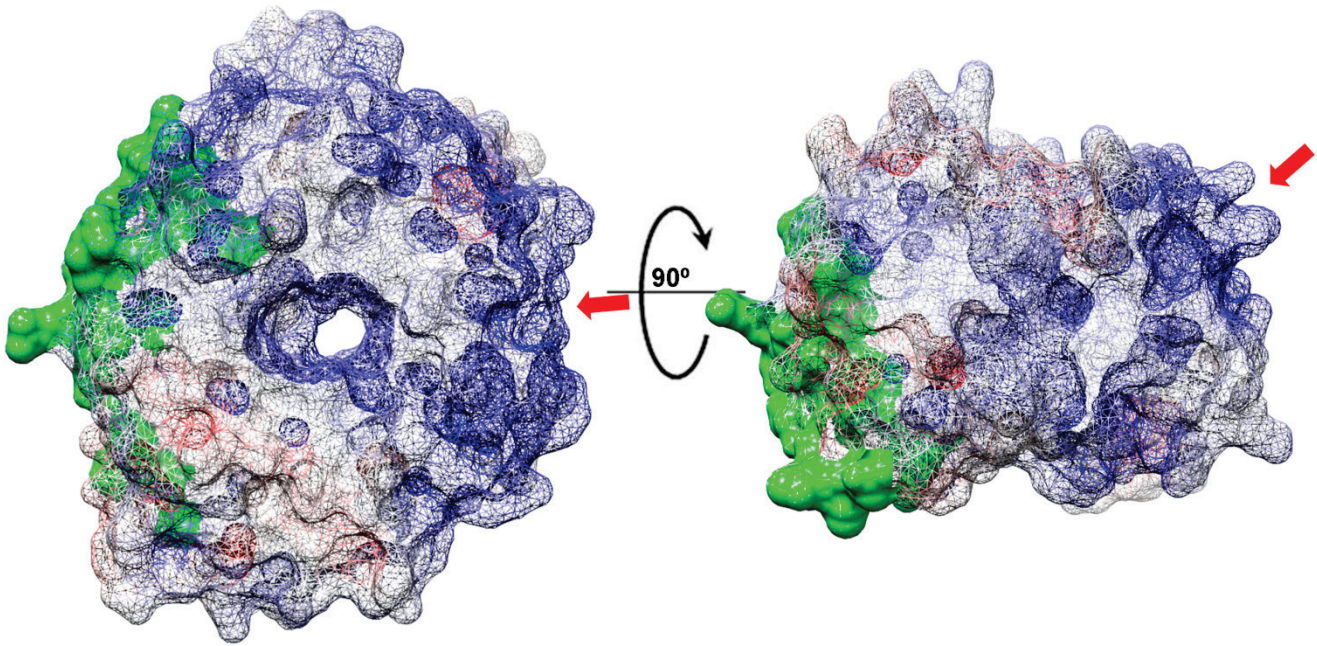

**Supplementary Figure S3.** Electrostatic surface potential of the  $\beta$ -propeller of Erb1 represented as mesh shows that highly electropositive area possibly involved in binding to RNA (red arrow) is located on the opposite side to Ytm1 binding site (in green)
